# Supplementary material for: Distinct bacterial communities in tropical island aquifers
Source: PubMed Central journal article supplement (PMC7192444; doi:10.1371/journal.pone.0232265), 2020-04-30
Supplement: pone.0232265.s001.pdf [file pone.0232265.s001.pdf]

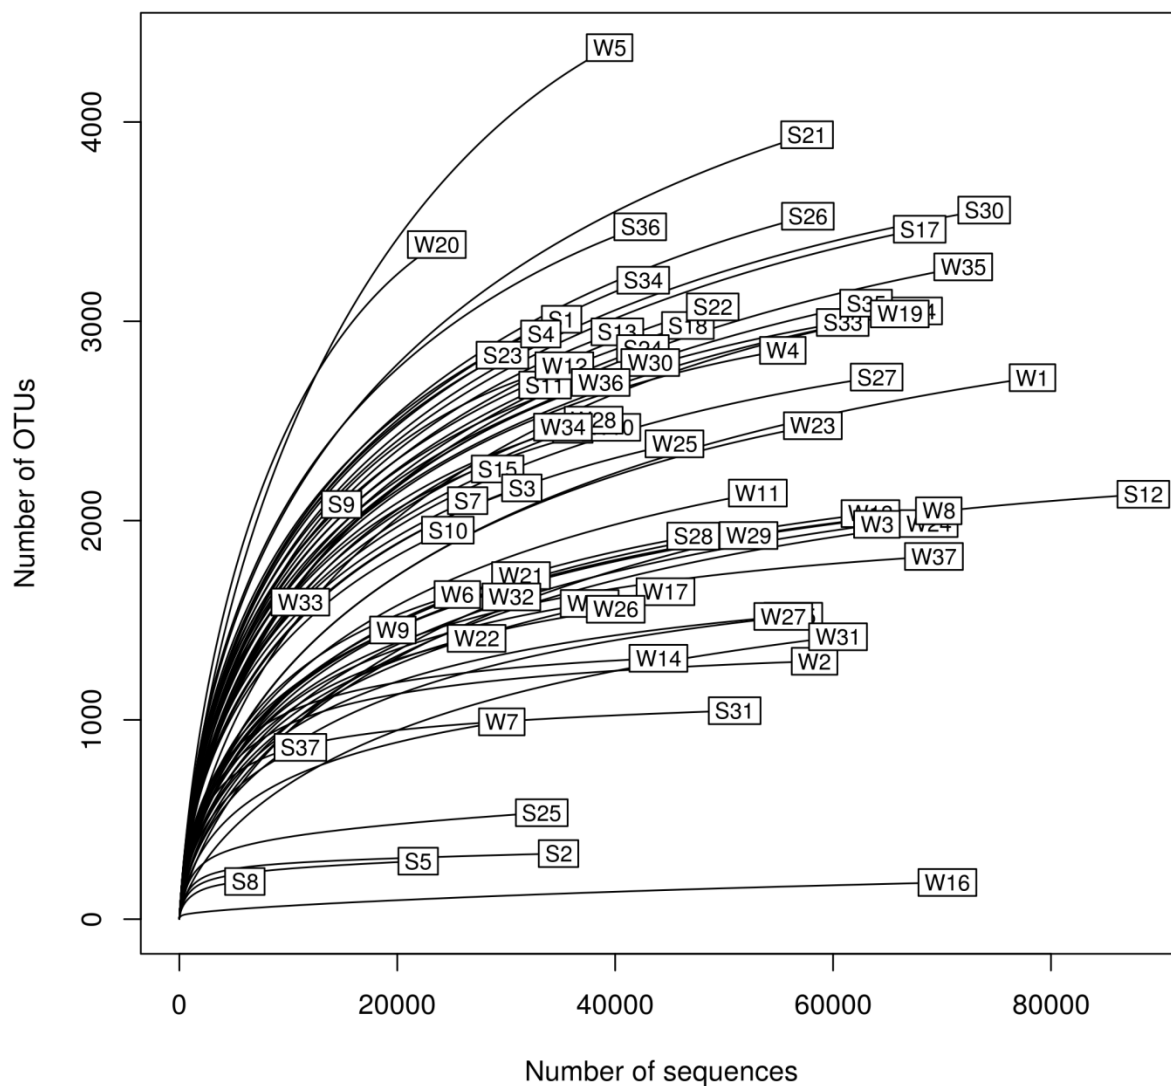

8

9 Figure S1. Rarefaction curves for the soil (S\*) and aquifer (W\*) samples.
