# Supplementary material for: Distinct bacterial communities in tropical island aquifers
Source: PubMed Central journal article supplement (PMC7192444; doi:10.1371/journal.pone.0232265), 2020-04-30
Supplement: pone.0232265.s002.pdf [file pone.0232265.s002.pdf]

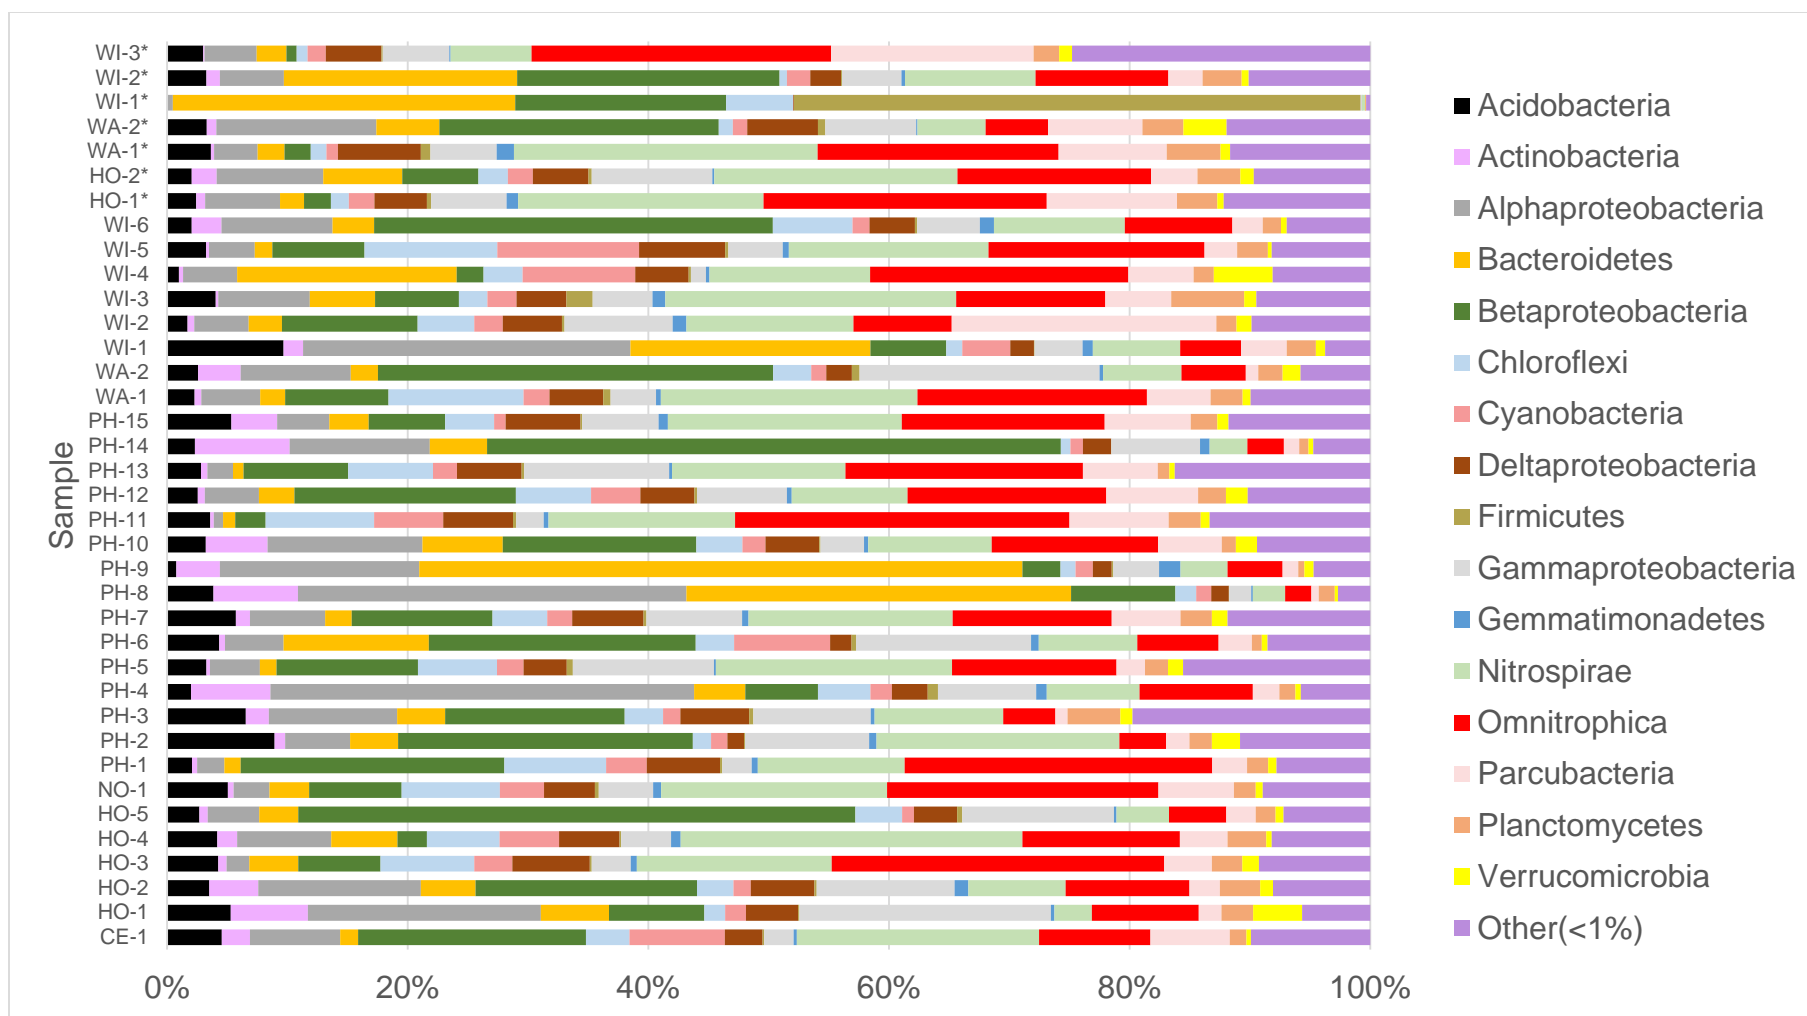

10

11 Figure S2. Relative abundance (%) of main bacterial phyla and classes of Proteobacteria in the aquifer samples collected based on the number of  
 12 sequences. Groups that comprised <1% of total sequences were clustered together as Others (<1%). CE –Central, HO – Honolulu, NO – North, PH  
 13 – Pearl Harbor, WA – Waianae, WI – Windward aquifers. \* indicates dike aquifers.
