# Supplementary material for: Distinct bacterial communities in tropical island aquifers
Source: PubMed Central journal article supplement (PMC7192444; doi:10.1371/journal.pone.0232265), 2020-04-30
Supplement: pone.0232265.s003.pdf [file pone.0232265.s003.pdf]

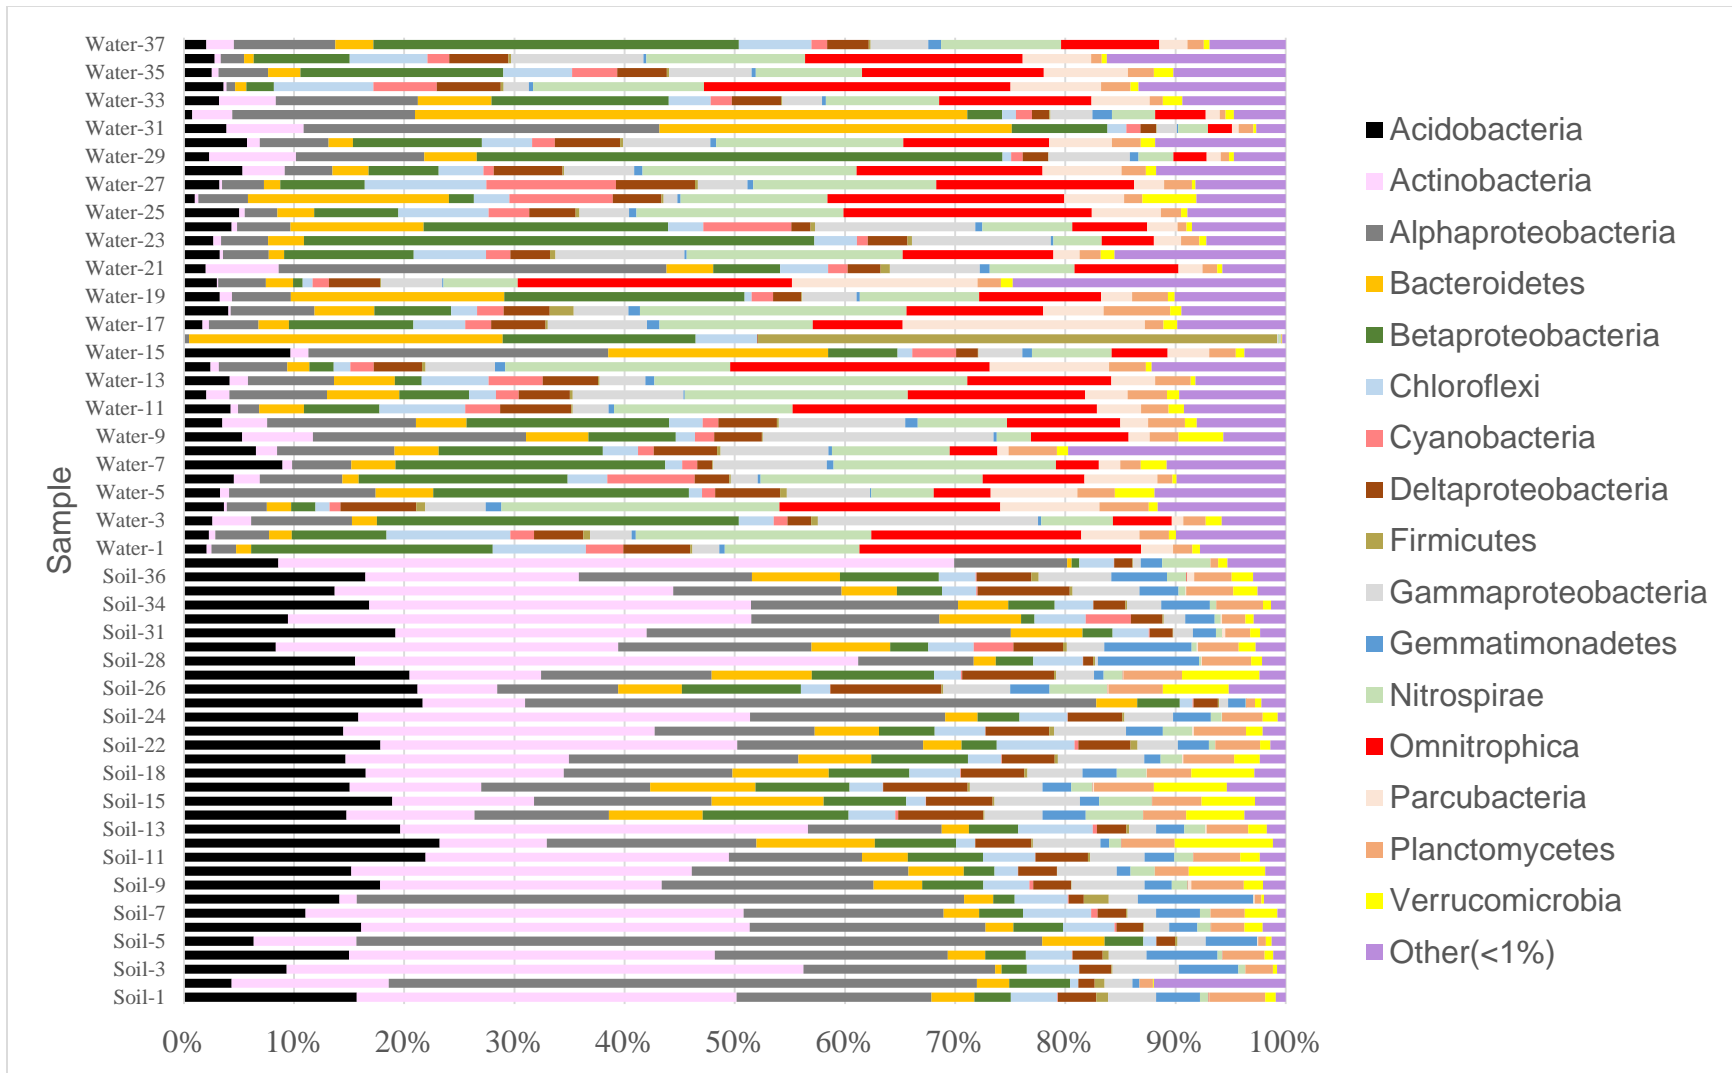

14

15 Figure S3. Main bacterial phyla and classes of Proteobacteria in the Oahu aquifers (Water\*) and soil (Soil\*) samples based on the  
 16 number of sequences detected in each group. Aquifer samples includes both basal and dike (4, 5, 12, 14, 16, 19,20) aquifer samples.
