# Supplementary material for: Distinct bacterial communities in tropical island aquifers
Source: PubMed Central journal article supplement (PMC7192444; doi:10.1371/journal.pone.0232265), 2020-04-30
Supplement: pone.0232265.s004.pdf [file pone.0232265.s004.pdf]

|                    | Basal_Aquifer - | Dike_Aquifer - | Soil - |
|--------------------|-----------------|----------------|--------|
| Proteobacteria -   | 37.5            | 27.4           | 35.2   |
| Actinobacteria -   | 2.2             | 0.7            | 25.9   |
| Acidobacteria -    | 3.7             | 2.5            | 15.2   |
| Nitrospirae -      | 12.7            | 12.6           | 1.5    |
| Omnitrophica -     | 12.3            | 14.2           | 0      |
| Bacteroidetes -    | 7.1             | 9.4            | 5.2    |
| Chloroflexi -      | 4.7             | 1.9            | 3.7    |
| Planctomycetes -   | 2.1             | 2.8            | 3.5    |
| Parcubacteria -    | 4.4             | 7.2            | 0.1    |
| Gemmatimonadetes - | 0.6             | 0.4            | 3.5    |

A

|                                        | Basal_Aquifer - | Dike_Aquifer - | Soil - |
|----------------------------------------|-----------------|----------------|--------|
| Proteobacteria; Bradyrhizobium -       | 0.8             | 0.3            | 6.1    |
| Nitrospirae; Leptospirillum -          | 4.3             | 8.4            | 0      |
| Omnitrophica; Candidatus Omnitrophus - | 2.9             | 3.5            | 0      |
| Bacteroidetes; Sediminibacterium -     | 3               | 0.3            | 0.3    |
| Acidobacteria; RB41 -                  | 0.1             | 0.1            | 2.8    |
| Nitrospirae; f__0319-6A21_OTU_47 -     | 2.7             | 0.5            | 0      |
| Nitrospirae; Nitrospira -              | 1.7             | 1.5            | 0.5    |
| Proteobacteria; Sphingomonas -         | 0.3             | 0.1            | 1.7    |
| Actinobacteria; Mycobacterium -        | 1.5             | 0.2            | 0.5    |
| Proteobacteria; H16 -                  | 1.2             | 0.5            | 0.7    |

B

17

18 Figure S4 Relative abundance of top ten phyla (A) and genera (B) in the aquifer (basal and dike) and soil samples.
