# Supplementary material for: Distinct bacterial communities in tropical island aquifers
Source: PubMed Central journal article supplement (PMC7192444; doi:10.1371/journal.pone.0232265), 2020-04-30
Supplement: pone.0232265.s005.pdf [file pone.0232265.s005.pdf]

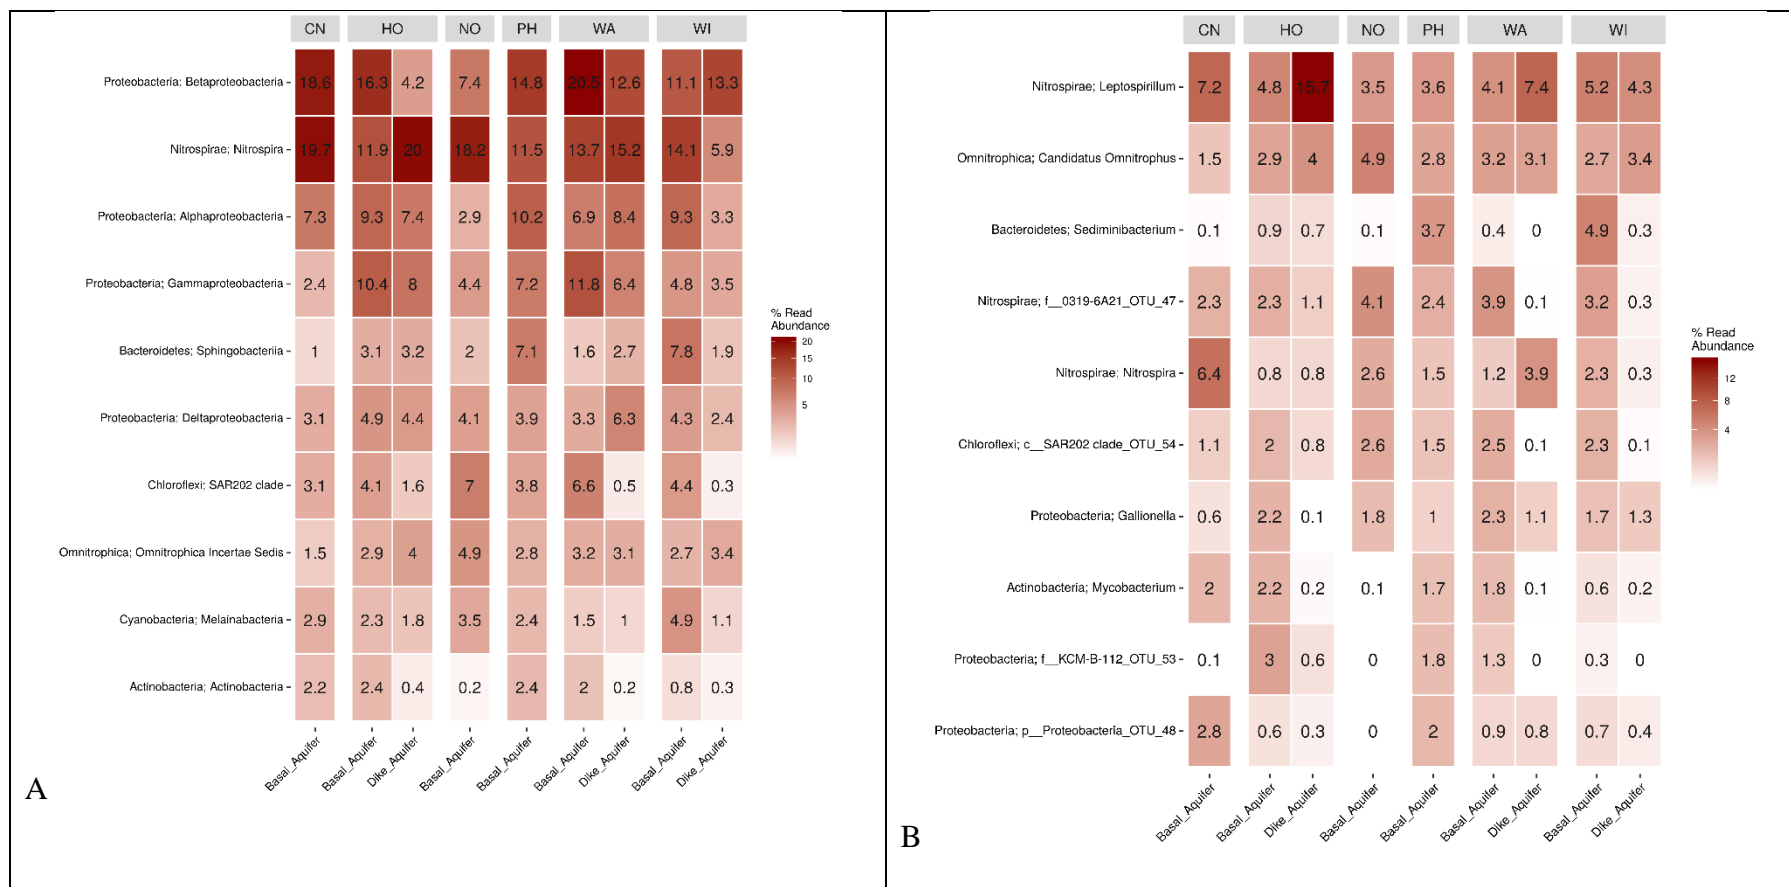

19

20 Figure S5 Top ten classes (A), and genera (B) based on the sequence abundance in the Oahu aquifers (CN – central, HO – Honolulu,

21 NO – North, PH– Pearl Harbor, WA – Waianae, and WI – Windward aquifers).
