# Supplementary material for: Distinct bacterial communities in tropical island aquifers
Source: PubMed Central journal article supplement (PMC7192444; doi:10.1371/journal.pone.0232265), 2020-04-30
Supplement: pone.0232265.s007.pdf [file pone.0232265.s007.pdf]

26 Table S1 Taxonomic affiliations of the most abundant operational taxonomic units (OTUs).

| RANK          | #OTU ID | Phylum         | Class               | Order               | Family            | Genus                    | # of sequences | %   |
|---------------|---------|----------------|---------------------|---------------------|-------------------|--------------------------|----------------|-----|
| Water Samples |         |                |                     |                     |                   |                          |                |     |
| 1             | OTU_47  | Nitrospirae    | Nitrospira          | Nitrospirales       | 0319-6A21         |                          | 40 782         | 2.4 |
| 2             | OTU_43  | Nitrospirae    | Nitrospira          | Nitrospirales       | Nitrospiraceae    | <i>Leptospirillum</i>    | 40 228         | 2.3 |
| 3             | OTU_2   | Bacteroidetes  | Sphingobacteriia    | Sphingobacteriales  | Chitinophagaceae  | <i>Sediminibacterium</i> | 34 110         | 2.0 |
| 4             | OTU_54  | Chloroflexi    | SAR202 clade        |                     |                   |                          | 28 092         | 1.6 |
| 5             | OTU_124 | Proteobacteria | Betaproteobacteria  | Nitrosomonadales    | Gallionellaceae   | <i>Gallionella</i>       | 23 950         | 1.4 |
| 6             | OTU_76  | Omnitrophica   |                     |                     |                   |                          | 21 173         | 1.2 |
| 7             | OTU_19  | Proteobacteria | Betaproteobacteria  | Nitrosomonadales    | Gallionellaceae   | uncultured               | 20 990         | 1.2 |
| 8             | OTU_53  | Proteobacteria | Gammaproteobacteria | Acidithiobacillales | KCM-B-112         |                          | 20 799         | 1.2 |
| 9             | OTU_17  | Bacteroidetes  | Bacteroidia         | Bacteroidales       | ML635J-40         |                          | 19 366         | 1.1 |
| 10            | OUT_48  | Proteobacteria |                     |                     |                   |                          | 17 818         | 1.0 |
| Soil Samples  |         |                |                     |                     |                   |                          |                |     |
| 1             | OTU_6   | Proteobacteria | Alphaproteobacteria | Rhizobiales         | Bradyrhizobiaceae | <i>Bradyrhizobium</i>    | 56 062         | 4.1 |
| 3             | OTU_506 | Actinobacteria | Thermoleophilia     | Solirubrobacterales | 288-2             |                          | 15 418         | 1.1 |
| 4             | OTU_123 | Proteobacteria | Alphaproteobacteria | Rhizobiales         | Xanthobacteraceae |                          | 13 960         | 1.0 |

|    |         |                |                     |                  |                   |                     |        |     |
|----|---------|----------------|---------------------|------------------|-------------------|---------------------|--------|-----|
| 5  | OTU_16  | Proteobacteria | Alphaproteobacteria | Caulobacterales  | Caulobacteraceae  | uncultured          | 10 782 | 0.8 |
| 6  | OTU_377 | Actinobacteria | Rubrobacteria       | Rubrobacterales  | Rubrobacteriaceae | <i>Rubrobacter</i>  | 10 762 | 0.8 |
| 7  | OTU_218 | Proteobacteria | Alphaproteobacteria | Sphingomonadales | Sphingomonadaceae | <i>Sphingomonas</i> | 9 921  | 0.7 |
| 8  | OTU_460 | Proteobacteria | Gammaproteobacteria | Xanthomonadales  | Xanthomonadales   |                     | 9 878  | 0.7 |
| 9  | OTU_224 | Proteobacteria | Alphaproteobacteria | Rhodospirillales | Rhodospirillaceae |                     | 6 853  | 0.5 |
| 10 | OTU_419 | Proteobacteria | Betaproteobacteria  | Nitrosomonadales | Nitrosomonadaceae | uncultured          | 6 788  | 0.5 |
|    |         |                |                     |                  | Blastocatellaceae |                     |        |     |
| 10 | OUT_243 | Acidobacteria  | Blastocatellia      | Blastocatellales | (Subgroup 4)      | RB41                | 6703   | 0.5 |

---

27

28
