# Supplementary material for: Distinct bacterial communities in tropical island aquifers
Source: PubMed Central journal article supplement (PMC7192444; doi:10.1371/journal.pone.0232265), 2020-04-30
Supplement: pone.0232265.s008.pdf [file pone.0232265.s008.pdf]

Table S2. Taxonomic affiliation of core OTUs that contributed  $\geq 2\%$  to core sequences.

| OTU Rank      | OTU taxonomic affiliation |                     |                    |                   |                          | Percent of core sequences |
|---------------|---------------------------|---------------------|--------------------|-------------------|--------------------------|---------------------------|
|               | Phylum                    | Class               | Order              | Family            | Genus                    | %                         |
| BASAL AQUIFER |                           |                     |                    |                   |                          |                           |
| 1             | Nitrospirae               | Nitrospira          | Nitrospirales      | 0319-6A21         |                          | 9.2                       |
| 2             | Bacteroidetes             | Sphingobacteriia    | Sphingobacteriales | Chitinophagaceae  | <i>Sediminibacterium</i> | 8.0                       |
| 3             | Chloroflexi               | SAR202 clade        |                    |                   |                          | 6.5                       |
| 4             | Proteobacteria            | Betaproteobacteria  | Nitrosomonadales   | Gallionellaceae   | <i>Gallionella</i>       | 4.8                       |
| 5             | Omnitrophica              |                     |                    |                   |                          | 4.2                       |
| 6             | Proteobacteria            | Betaproteobacteria  | Nitrosomonadales   | Gallionellaceae   | <i>Sideroxydans</i>      | 3.9                       |
| 7             | Chloroflexi               | SAR202 clade        |                    |                   |                          | 3.9                       |
| 8             | Proteobacteria            |                     |                    |                   |                          | 3.8                       |
| 9             | Cyanobacteria             | Melainabacteria     | Caenarcaniphilales |                   |                          | 3.5                       |
| 10            | Proteobacteria            | Alphaproteobacteria | Rhodospirillales   | Rhodospirillales  | <i>Reyranella</i>        | 2.7                       |
| 11            | Omnitrophica              |                     |                    |                   |                          | 2.4                       |
| 12            | Nitrospirae               | Nitrospira          | Nitrospirales      | Nitrospiraceae    | <i>Leptospirillum</i>    | 2.3                       |
| 13            | Proteobacteria            | Alphaproteobacteria | Rhizobiales        | Bradyrhizobiaceae | <i>Bradyrhizobium</i>    | 2.1                       |

|              |                |                     |                    |                  |                       |      |
|--------------|----------------|---------------------|--------------------|------------------|-----------------------|------|
| 14           | Proteobacteria | Betaproteobacteria  | Burkholderiales    | Comamonadaceae   | <i>Aquabacterium</i>  | 2.1  |
| 15           | Chloroflexi    | SAR202 clade        |                    |                  |                       | 2.0  |
| DIKE AQUIFER |                |                     |                    |                  |                       |      |
| 1            | Nitrospirae    | Nitrospira          | Nitrospirales      | Nitrospiraceae   | <i>Leptospirillum</i> | 38.6 |
| 2            | Bacteroidetes  | Cytophagia          | Cytophagales       | Cytophagaceae    | uncultured            | 23.1 |
| 3            | Nitrospirae    | Nitrospira          | Nitrospirales      | Nitrospiraceae   | <i>Leptospirillum</i> | 5.6  |
| 4            | Proteobacteria | Betaproteobacteria  | Nitrosomonadales   | Gallionellaceae  | uncultured            | 4.5  |
| 5            | Nitrospirae    | Nitrospira          | Nitrospirales      | 0319-6A21        |                       | 2.9  |
| 6            | Proteobacteria | Alphaproteobacteria | 4-Org1-14          |                  |                       | 2.9  |
| 7            | Proteobacteria | Alphaproteobacteria | Rhodospirillales   | Rhodospirillales | <i>Reyranella</i>     | 2.4  |
| 8            | Proteobacteria |                     |                    |                  |                       | 2.3  |
| 9            | Cyanobacteria  | Melainabacteria     | Caenarcaniphilales |                  |                       | 2.3  |
| 10           | Proteobacteria | Betaproteobacteria  | Nitrosomonadales   | Gallionellaceae  | <i>Sideroxydans</i>   | 2.2  |
