# Supplementary material for: Distinct bacterial communities in tropical island aquifers
Source: PubMed Central journal article supplement (PMC7192444; doi:10.1371/journal.pone.0232265), 2020-04-30
Supplement: pone.0232265.s009.pdf [file pone.0232265.s009.pdf]

Table S3. Importance of various environmental parameters explaining bacterial community structure variations in samples collected from the aquifers and tunnels on Oahu island, Hawai'i.

|                        | Basal aquifer samples |       |                           | All water samples |       |              |
|------------------------|-----------------------|-------|---------------------------|-------------------|-------|--------------|
|                        | R <sup>2</sup>        | P     | Significance <sup>1</sup> | R <sup>2</sup>    | P     | Significance |
| Conductivity           | 0.416                 | 0.005 | **                        | 0.370             | 0.006 | **           |
| Alkalinity             | 0.243                 | 0.063 | .                         | 0.183             | 0.048 | *            |
| Hardness               | 0.300                 | 0.032 | *                         | 0.134             | 0.129 |              |
| pH                     | 0.415                 | 0.003 | **                        | 0.535             | 0.001 | **           |
| Turbidity              | 0.088                 | 0.389 |                           | 0.137             | 0.142 |              |
| Total Dissolved Solids | 0.501                 | 0.003 | **                        | 0.468             | 0.001 | ***          |
| Bicarbonate            | 0.230                 | 0.066 | .                         | 0.355             | 0.004 | **           |
| Calcium                | 0.209                 | 0.101 | .                         | 0.126             | 0.147 |              |
| Chloride               | 0.316                 | 0.019 | *                         | 0.217             | 0.040 | *            |
| Magnesium              | 0.295                 | 0.035 | *                         | 0.231             | 0.029 | *            |
| Potassium              | 0.524                 | 0.002 | **                        | 0.425             | 0.001 | ***          |
| Nitrate                | 0.488                 | 0.005 | **                        | 0.543             | 0.001 | ***          |
| Phosphate              | 0.368                 | 0.012 | *                         | 0.434             | 0.001 | ***          |
| Silica                 | 0.035                 | 0.694 |                           | 0.275             | 0.012 | *            |
| Sodium                 | 0.679                 | 0.001 | ***                       | 0.591             | 0.001 | ***          |
| Sulfate                | 0.575                 | 0.001 | ***                       | 0.515             | 0.001 | ***          |

<sup>1</sup>Significance codes: 0 '\*\*\*' 0.001 '\*\*' 0.01 '\*' 0.05 '.' 0.1 ' ' 1
